# Supplementary material for: Very Low Dose Fetal Exposure to Chernobyl Contamination Resulted in Increases in Infant Leukemia in Europe and Raises Questions about Current Radiation Risk Models
Source: MDPI journal article supplement (doi:10.3390/ijerph6123105), 2009-12-07
Supplement: s1 [file s1]

*Correction*

## **Publisher's Note – Received Date Error, *Int. J. Environ. Res. Public Health* 2009, 6, 3105-3114**

**Shu-Kun Lin**

Molecular Diversity Preservation International (MDPI), Kandererstrasse 25, CH-4057 Basel, Switzerland ; E-Mail: lin@mdpi.org

*Received: 29 December 2009 / Published: 29 December 2009*

---

*Publisher's Note* added on 29 December 2009: The received date of *Int. J. Environ. Res. Public Health* **2009**, *6*, 3105-3114 was wrongly published. The correct received date is 13 October 2009, not 13 October 2008.

### **References**

1. Busby, C.C. Very Low Dose Fetal Exposure to Chernobyl Contamination Resulted in Increases in Infant Leukemia in Europe and Raises Questions about Current Radiation Risk Models. *Int. J. Environ. Res. Public Health* **2009**, *6*, 3105-3114.

© 2010 by the authors; licensee Molecular Diversity Preservation International, Basel, Switzerland. This article is an open-access article distributed under the terms and conditions of the Creative Commons Attribution license (<http://creativecommons.org/licenses/by/3.0/>).
